# Supplementary material
Source: Frontiers journal article supplement (https://www.frontiersin.org/articles/544320)
Supplement: Presentation_1.pdf [file Presentation_1.pdf]

## Supplementary Material

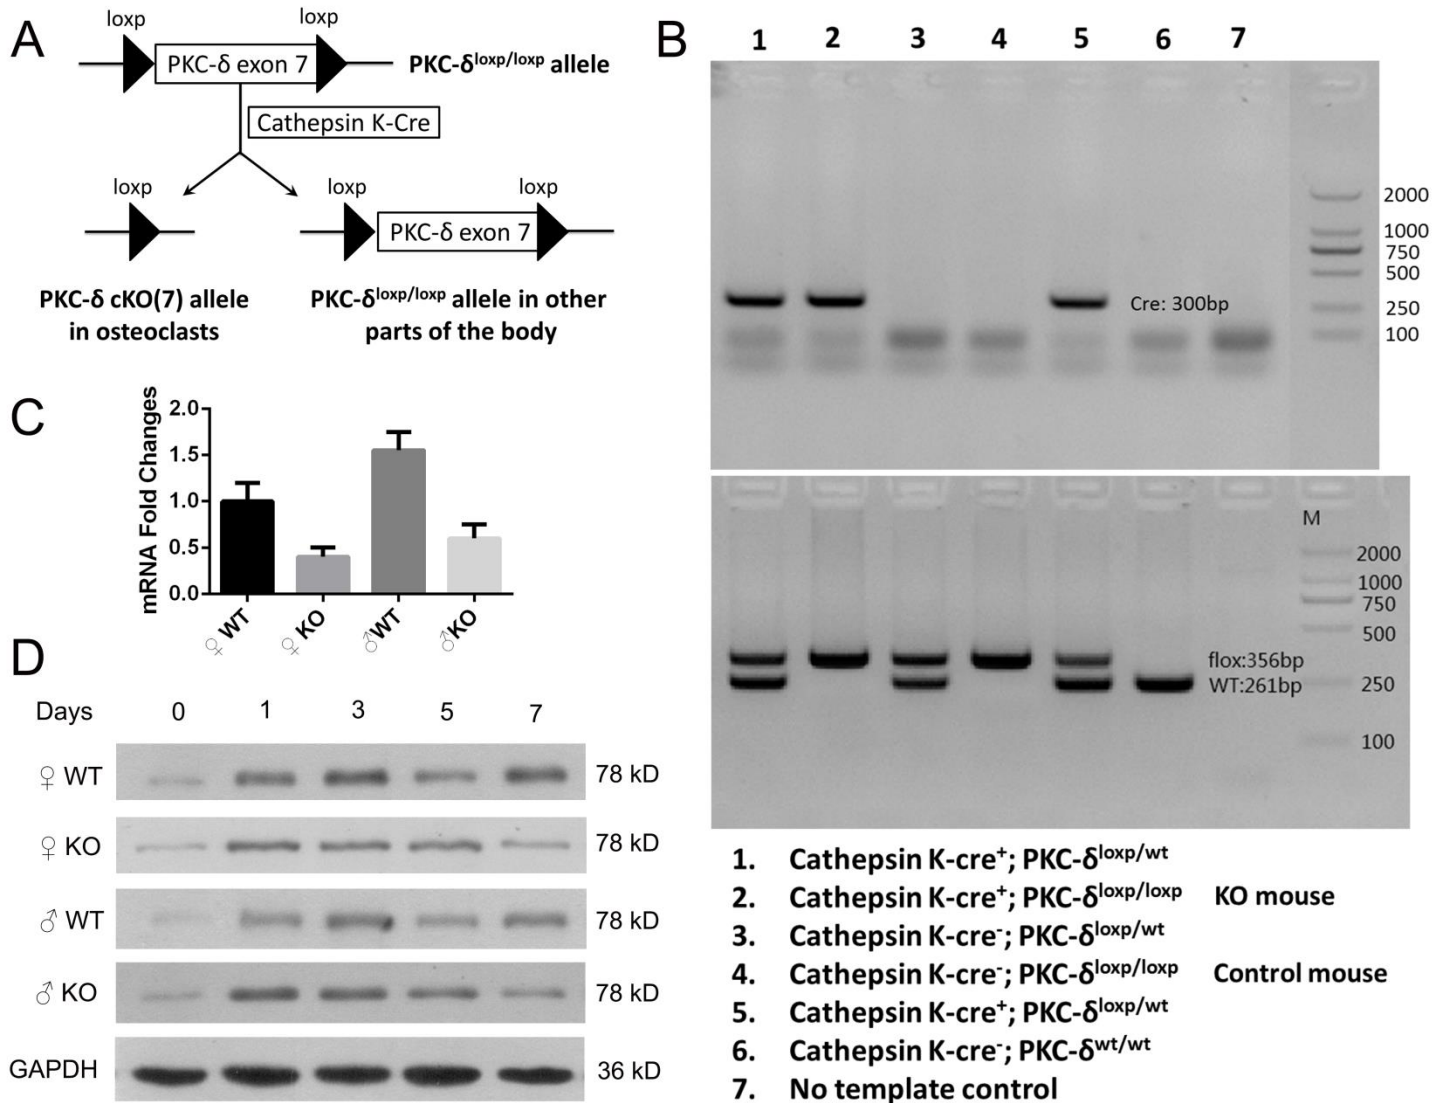

**Supplementary Fig. 1** Generation and confirmation of Cathepsin-K-driven PKC- $\delta$  deletion in osteoclasts in mice. (A) Strategy for inserting flox sites into the mouse PKC- $\delta$  gene; (B) PCR analysis of extracted gDNA from tails derived from wide type, PKC- $\delta$  cKO and flox control mice. The 300 bp PCR fragment is detected in PKC- $\delta$  cKO mice, indicating Cre-mediated excision; (C) Quantitative RT-PCR analysis of PKC- $\delta$  mRNA and validation of PKC- $\delta$ -targeted mouse osteoclast cKO in BMMs stimulated with RANKL for 5 days of PKC- $\delta$  cKO and wide type control mice. Values are expressed as the mean of three independent experiments  $\pm$  SD; (D) Western Blot analysis of PKC- $\delta$  in BMMs co-culture with RANKL in the indicated days in PKC- $\delta$  cKO and wide type control mice, validating efficacy of PKC- $\delta$  ablation for floxed allele compared to PKC- $\delta$  germline wild-type control.

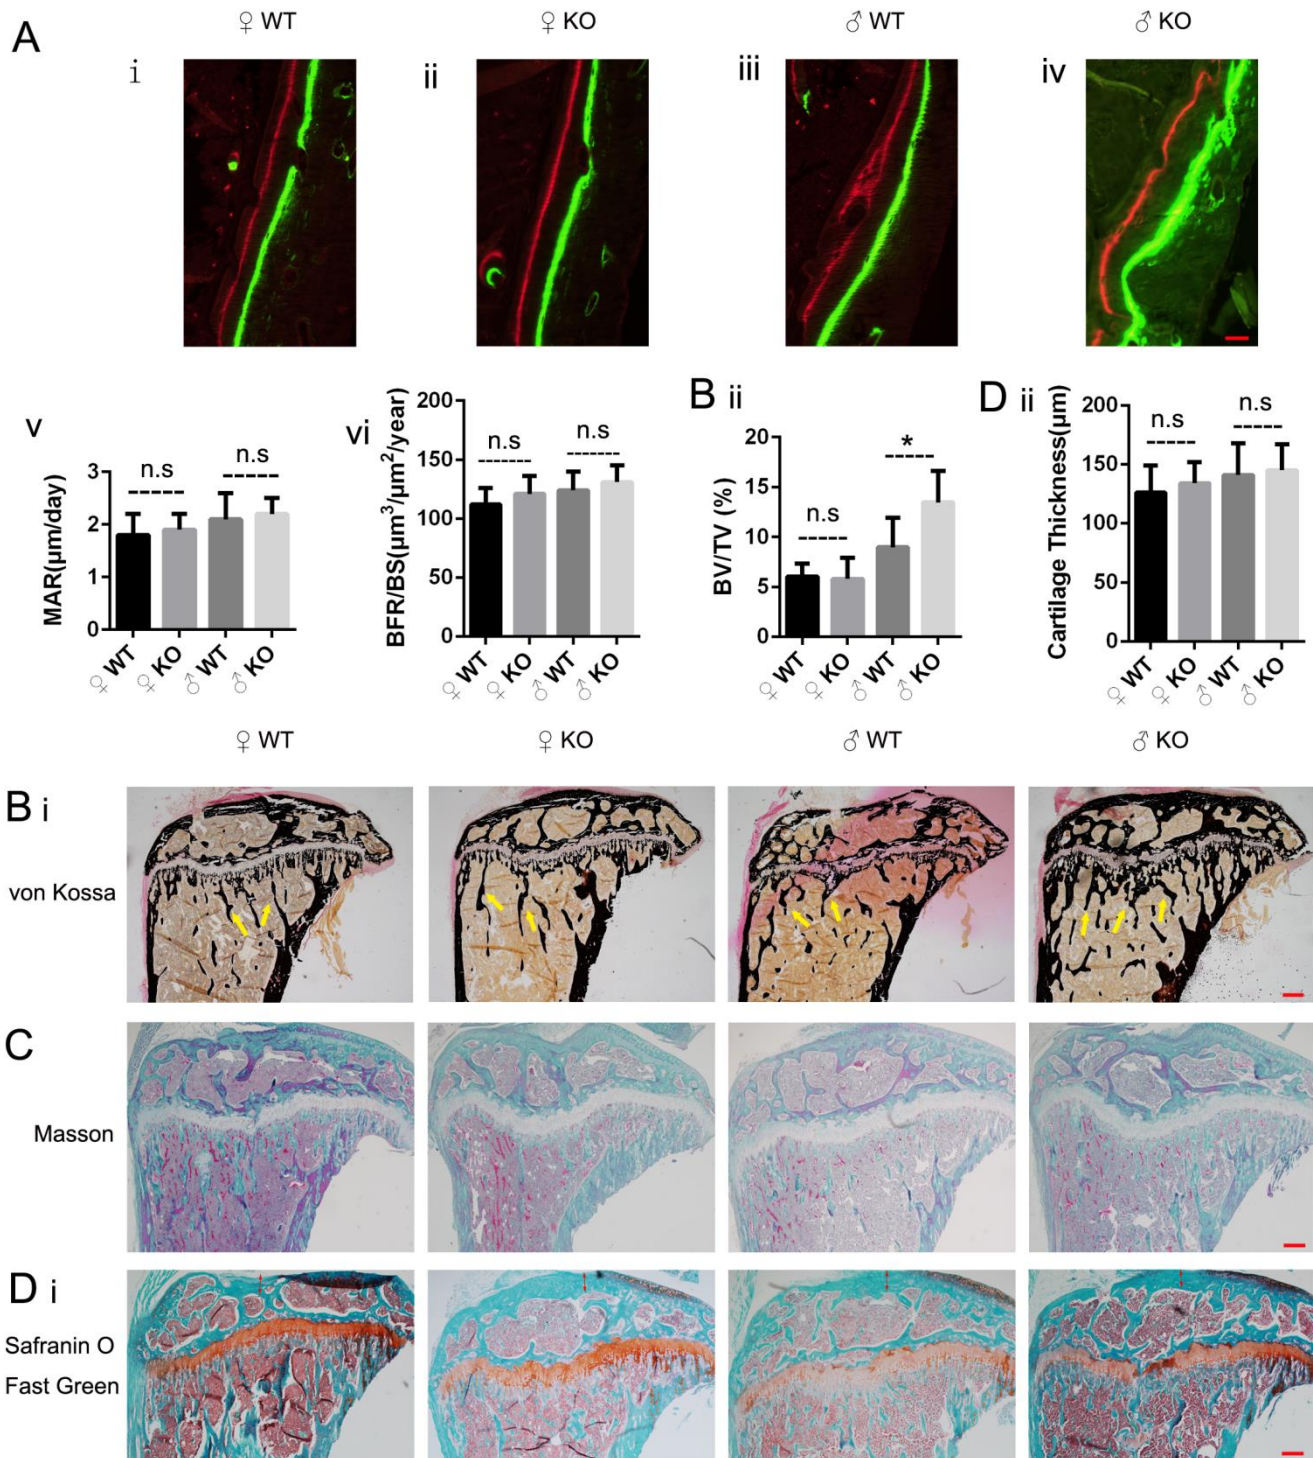

**Supplementary Fig. 2** Bone formation analysis and representative images of bone component analysis from proximal tibia of 12-week-old WT and PKC- $\delta$  cKO mice. (A) Representative images of fluorescence double labeling (i-iv) to visualize bone formation and histomorphometric analysis of the mineral apposition rate (MAR, v) and the bone formation rate relative to the bone surface (BFR/BS, vi). n.s. no statistical significance compared with WT control group; (B) Representative images of von

Kossa staining to determine changes of inorganic elements in bone. Arrows indicate the trabecular bone (i) and analysis of trabecular bone volume fraction (BV/TV, %; ii). n.s. no statistical significance, \* $p < 0.05$  vs. WT control group; (C) Representative images of Masson staining to visualize changes of organic elements in bone; (D) Representative images of safranin O staining to determine articular cartilage and double head red arrows depict the thickness of the articular cartilage (i). Quantitative analysis of cartilage thickness was shown in Dii. Bars represent 50 $\mu$ m for A and 200 $\mu$ m for B, C and D respectively.

**Supplementary Table 1** Primer sequences used in gDNA PCR and qRT-PCR

| Genes         | Forward (5'-3')          | Reverse (5'-3')        | Purpose  |
|---------------|--------------------------|------------------------|----------|
| PKC- $\delta$ | GCCAGCCTTTCTGTGCTGTG     | TCCACTCAGGATACATGGTGGG | gDNA PCR |
| PKC- $\delta$ | CAGACCAAGGACCACCTGTT     | CGTCCCTGTCTAGCATCACA   | qRT-PCR  |
| AR            | TGGTAGCTGGTACTTCTAATGC-3 | CATAAGGTCCGGAGTAGTTCTC | qRT-PCR  |
| GAPDH         | ACCCAGAAGACTGTGGATGG     | CACATTGGGGGTAGGAACAC   | qRT-PCR  |

**Supplementary Table 2** Antibodies used in Western blotting assay

| Names                                       | Company                     | Catalog Number |
|---------------------------------------------|-----------------------------|----------------|
| Caspase-3                                   | Cell Signaling Technologies | #9665          |
| cleaved Caspase-3                           | Cell Signaling Technologies | #9664          |
| PARP                                        | Cell Signaling Technologies | #9542          |
| cleaved PARP                                | Cell Signaling Technologies | #9548          |
| extracellular signal-regulated kinase (ERK) | Cell Signaling Technologies | #4695          |
| p-ERK                                       | Cell Signaling Technologies | #4370          |
| c-Jun amino-terminal kinase (JNK)           | Cell Signaling Technologies | #9252          |
| p-JNK                                       | Cell Signaling Technologies | #4668          |
| P-38                                        | Cell Signaling Technologies | #8690          |
| p-P38                                       | Cell Signaling Technologies | #4511          |
| androgen receptor (AR)                      | Abcam                       | ab133273       |
| PKC- $\delta$                               | Abcam                       | ab182126       |

IκB-α

Abcam

ab7217

CTSK

SANTA CRUZ

sc-48353

---
